# Supplementary material for: Development of Novel PET-PAN Electrospun Nanocomposite Membrane Embedded with Layered Double Hydroxides Hybrid for Efficient Wastewater Treatment
Source: MDPI journal article supplement (doi:10.3390/polym15224388), 2023-11-12
Supplement: s1 [file s1]

## Supplementary data

Type of the Paper (Article)

# Development of novel PET-PAN electrospun nanocomposite membrane embedded with Layered double hydroxides-hybrid for efficient wastewater treatment

Abdul Majeed Pirzada <sup>1,\*</sup>, Imran Ali <sup>1,\*</sup>, Nabi Bakhsh Mallah <sup>2</sup> and Ghulamullah Maitlo <sup>3</sup>

<sup>1</sup> Department of Environmental Sciences, Sindh Madressatul Islam University, Karachi, Pakistan; ampirzada@smiu.edu.pk (A.M.P); imranali@hanyang.ac.kr ; imran.ali@smiu.edu.pk (I.A)

<sup>2</sup> Faculty of Engineering, Science and Technology, Hamdard University, Karachi, Pakistan; nabi.bakhsh@hamdard.edu.pk

<sup>3</sup> Department of Chemical Engineering, Dawood University of Engineering and Technology, Karachi, Pakistan; ghulam.maitlo@duet.edu.pk

\* Correspondence: ampirzada@smiu.edu.pk (A.M.P); imranali@hanyang.ac.kr (I.A)

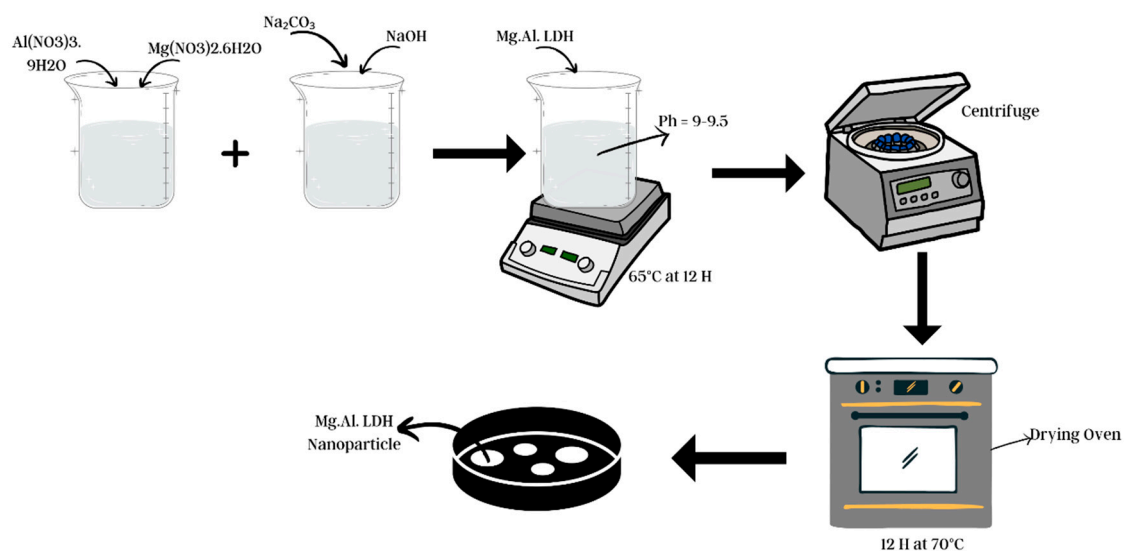

Figure S1. Schematic diagram of synthesis of Mg-Al-LDH nanoparticles.
